# Supplementary material for: Engineered Salmonella enterica serovar Typhimurium overcomes limitations of anti-bacterial immunity in bacteria-mediated tumor therapy
Source: PubMed Central journal article supplement — Oncoimmunology. 2017 Oct 16;7(2):e1382791. doi: 10.1080/2162402X.2017.1382791 (PMC5749626; doi:10.1080/2162402x.2017.1382791), 2017-10-16
Supplement: koni-07-02-1382791-s001.pdf [file koni-07-02-1382791-s001.pdf]

# Supplementary Figures

1

2 **Supplementary Figure S1:**

**A**

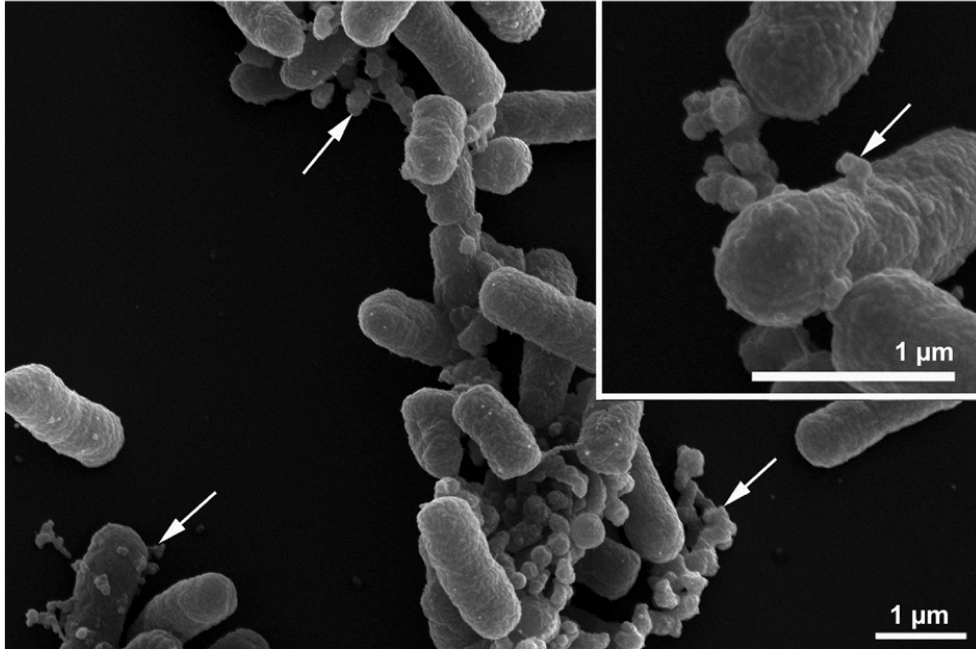

**B**

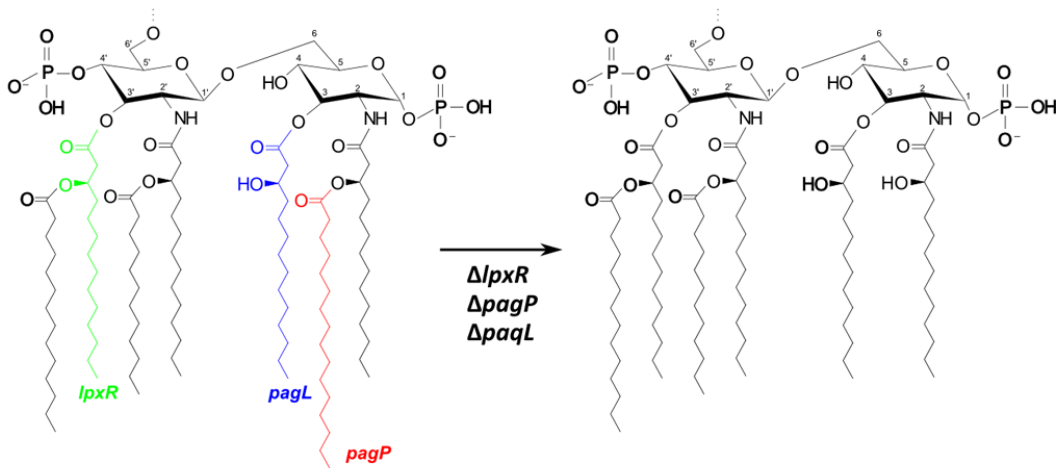

3

**Wt**

**SF200**

4 **Supplementary Figure S1: Phenotype of SF200 ( $\Delta lpxR9 \Delta pagL7 \Delta pagP8 \Delta aroA \Delta ydiV$**

5 ***AfliF*).** (A) Scanning electron microscopy of SF200. *AfliF* results in a non-flagellated

6 phenotype. White arrows indicate putative OMV formation; insert showing OMV formation

7 at higher magnification on the bacterial surface. (B) Schematic representation of the Lipid A

8 molecule. Left: Wt *Salmonella* is able to modify the Lipid A structure by means of *pagP*,

9 *pagL* and *lpxR* resulting in heterogeneous mixtures of Lipid A molecules. Right: Deletion of

10 such genes resulted in the homogeneous hexa-acylated structure of SF200.

11 **Supplementary Figure S2:**

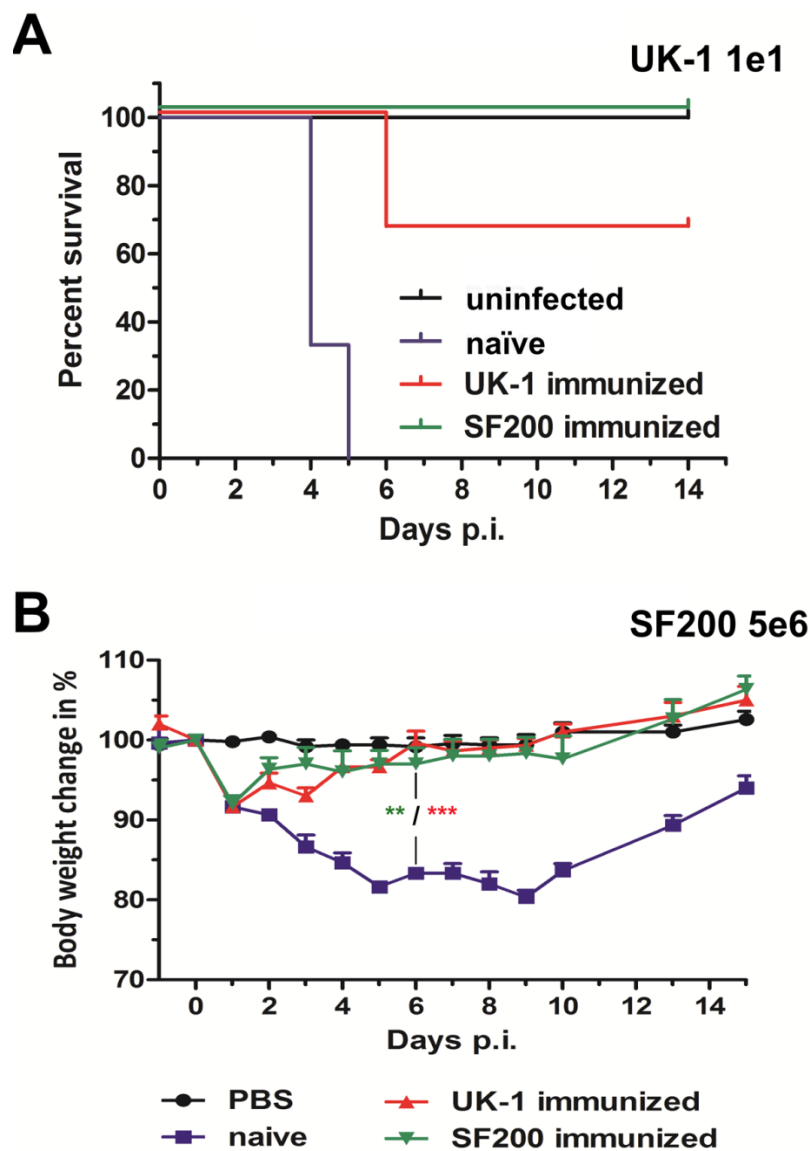

12

13 **Supplementary Figure S2: Effect of UK-1 and SF200 (*AlpxR9* *ApagL7* *ApagP8* *AaroA***  
 14 ***AydiV* *AfliF*) immunization on mouse survival upon secondary infection.** Mice were pre-  
 15 treated with PBS (naïve), heat-inactivated UK-1 (UK-1 immunized) or heat-inactivated SF200  
 16 (SF200 immunized). Pre-exposed mice were intravenously infected with  $10^1$  UK-1 (A) and  
 17  $5 \cdot 10^6$  SF200 (B). Mouse survival was monitored for 14 days. Uninfected mice served as  
 18 control. Displayed are values of mean  $\pm$  SD of four replicates in each group.

19 **Supplementary Figure S3:**

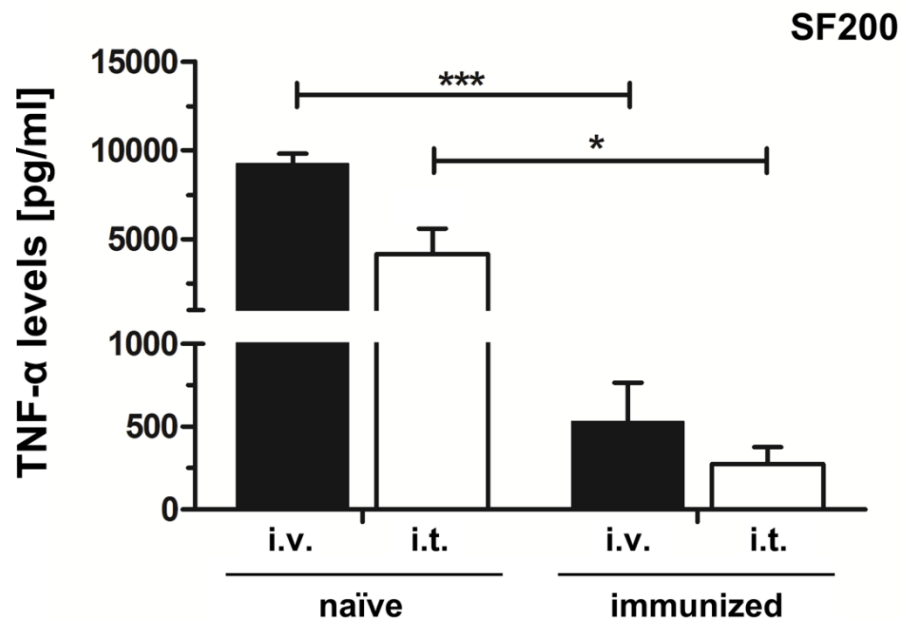

20

21 **Supplementary Figure S3: TNF- $\alpha$  induction of *Salmonella* in naïve and immunized mice**  
22 **upon infection.** Naïve and immunized CT26 tumor-bearing mice were infected intravenously  
23 and intratumorally with  $5 \times 10^6$  SF200 ( $\Delta lpxR9 \Delta pagL7 \Delta pagP8 \Delta aroA \Delta ydiV \Delta fliF$ ). TNF- $\alpha$   
24 levels were measured in sera of CT26 tumor bearing mice isolated 1.5 h upon infection with  
25 SF200. Displayed are values of mean  $\pm$  SD. Results are representative of two independent  
26 experiments with six replicates in each group. \*,  $p < 0.05$ ; \*\*\*,  $p < 0.001$ .

27

## Supplementary Figures

28 **Supplementary Figure S4:**

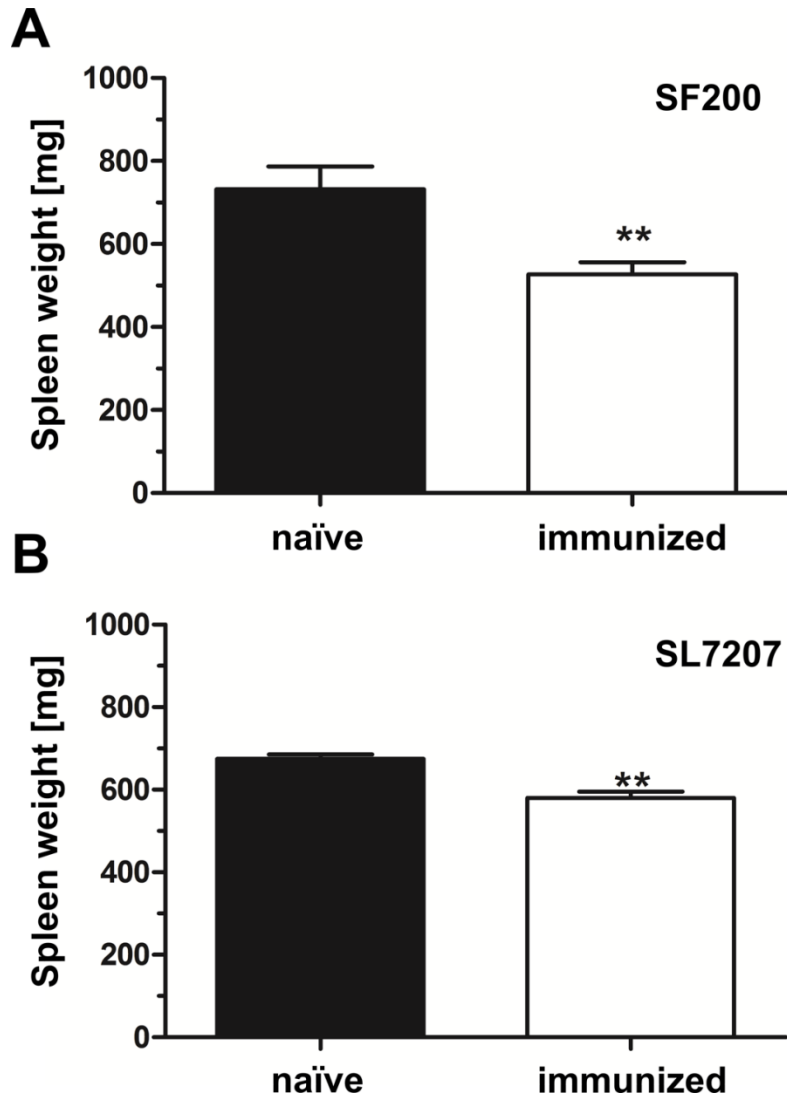

29

30 **Supplementary Figure S4: Spleen phenotype of naïve and immunized mice upon infection**  
31 **with *Salmonella*.** Naïve and immunized CT26 tumor-bearing mice were infected  
32 intravenously  $5 \times 10^6$  SF200 (*ΔlpxR9 ΔpagL7 ΔpagP8 ΔaroA ΔydiV ΔfliF*) (A) or SL7207 (B).  
33 Spleen weight was measured with a scale 6 dpi and used as indicator for splenomegaly.  
34 Displayed are values of mean  $\pm$  SD. Results are representative of two independent  
35 experiments with six replicates in each group. \*,  $p < 0.05$ ; \*\*,  $p < 0.01$ .

36

## Supplementary Figures

37 **Supplementary Figure S5:**

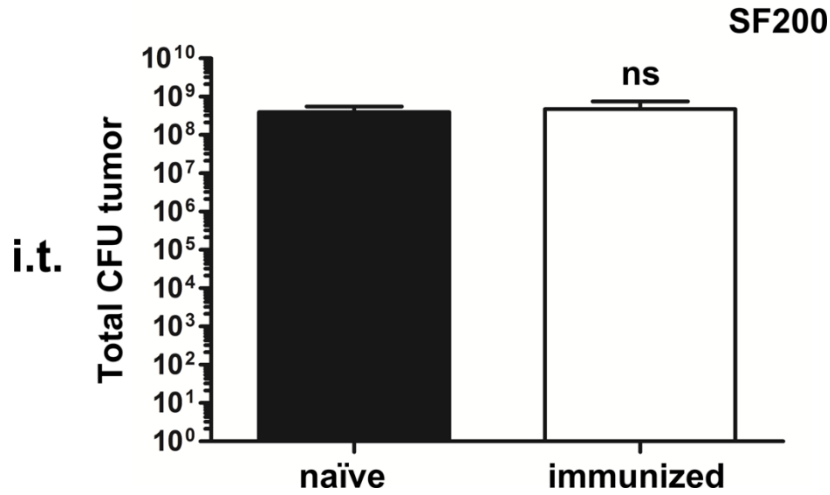

38

39 **Supplementary Figure S5: Tumor colonization of naïve and immunized mice upon**  
40 **infection with *Salmonella*.** Naïve and immunized CT26 tumor-bearing mice were infected  
41 intratumorally with  $5 \times 10^6$  SF200 ( $\Delta lpxR9 \Delta pagL7 \Delta pagP8 \Delta aroA \Delta ydiV \DeltafliF$ ). Total CFU  
42 values were determined by serial plating at 4 dpi. Displayed are values of mean  $\pm$  SD. Results  
43 are representative of two independent experiments with six replicates in each group.

44

## Supplementary Figures

45 **Supplementary Figure S6:**

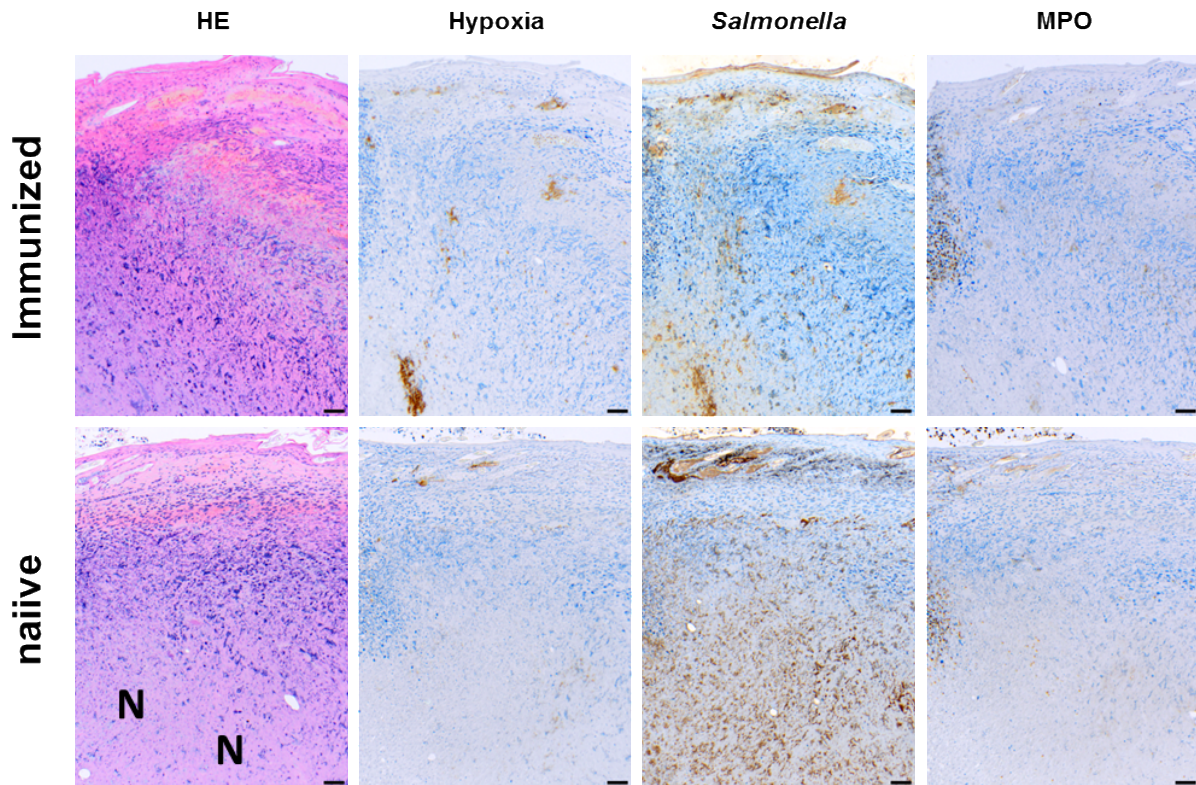

46

47 **Supplementary Figure S6: Pre-exposure reduces the formation of necrosis in the early**  
48 **stages of infection upon intratumoral infection with *Salmonella*.** CT26 tumor-bearing  
49 mice were infected with  $5 \times 10^6$  SF200 ( $\Delta lpxR9 \Delta pagL7 \Delta pagP8 \Delta aroA \Delta ydiV \Delta fliF$ ) via  
50 intratumoral infection. 48 hpi, tumors were isolated and prepared for immune histochemical  
51 staining. Immunized mice are less prone to necrosis formation and hypoxia. Dispersion of  
52 salmonellae in and beyond necrotic center, and presence of neutrophils in immediate  
53 proximity to the salmonellae was only clearly visible in naïve mice. “N” denotes areas  
54 necrosis. Hypoxia was stained with antibodies against metabolites of pimonidazole-HCl,  
55 otherwise administered i.v. 30 mins prior to isolation. Myeloperoxidase (MPO) denotes  
56 presence of neutrophilic granulocytes, and *Salmonella* was stained using a specific antibody.  
57 Differential staining was performed on consecutive sections. Scale bar corresponds to 100  
58  $\mu\text{m}$ . Images representative of at least 3 replicates are displayed.



59

## Supplementary Figures

60 **Supplementary Figure S7:**

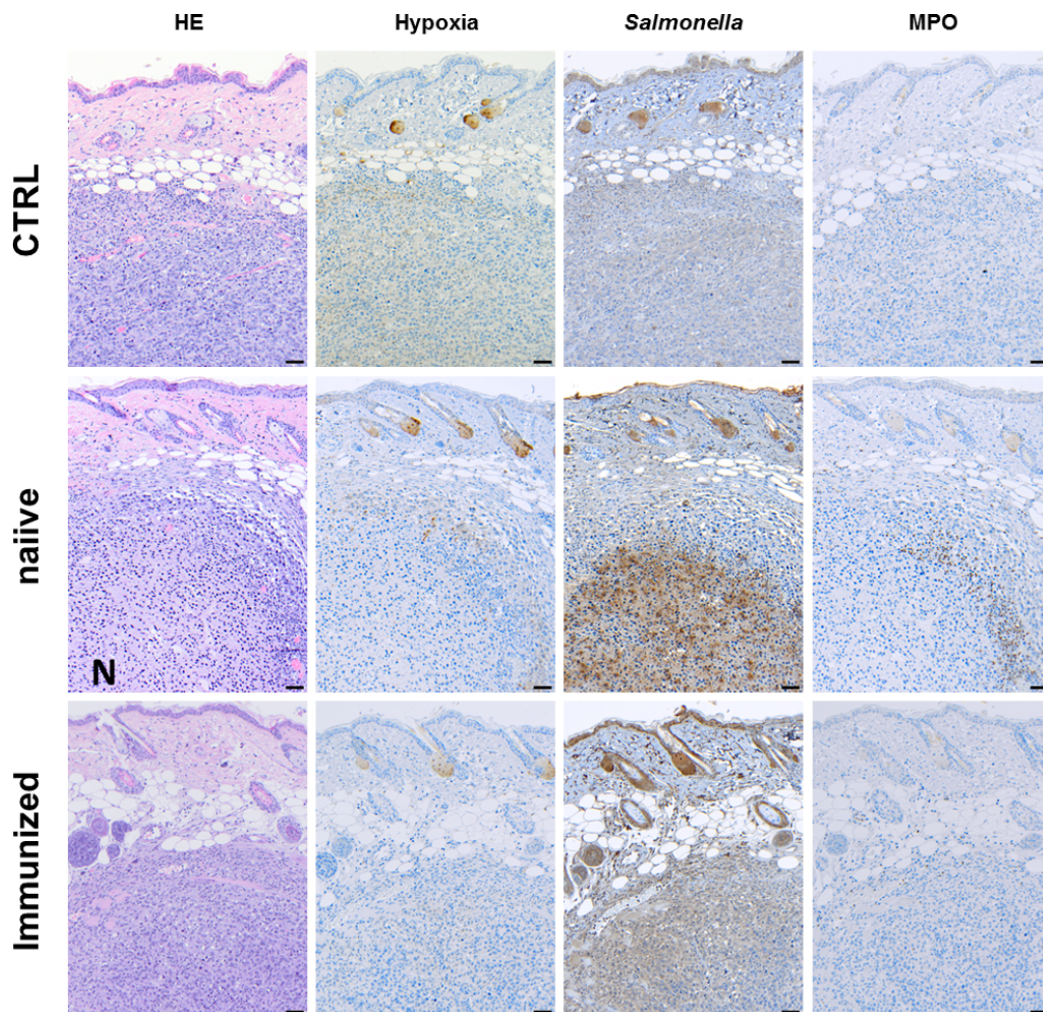

61

62 **Supplementary Figure S7: Pre-exposure reduces the formation of necrosis in the early**  
63 **stages of infection upon intravenous infection with *Salmonella*.** CT26 tumor-bearing mice  
64 were infected with  $5 \times 10^6$  SF200 ( $\Delta lpxR9 \Delta pagL7 \Delta pagP8 \Delta aroA \Delta ydiV \Delta fliF$ ) via intravenous  
65 infection. 24 hpi, tumors were isolated and prepared for immune histochemical staining.  
66 Immunized mice are less prone to necrosis formation and hypoxia. Dispersion of salmonellae  
67 in and beyond necrotic center, and presence of neutrophils in immediate proximity to the  
68 salmonellae was only clearly visible in naïve mice. “N” denotes areas necrosis. Hypoxia was  
69 stained with antibodies against metabolites of pimonidazole-HCl, otherwise administered i.v.  
70 30 mins prior to isolation. Myeloperoxidase (MPO) denotes presence of neutrophilic  
71 granulocytes, and *Salmonella* was stained using a specific antibody. Differential staining was  
72 performed on consecutive sections. Scale bar corresponds to 100  $\mu$ m. Images representative  
73 of at least 3 replicates are displayed.

74

## Supplementary Figures

75 **Supplementary Figure S8:**

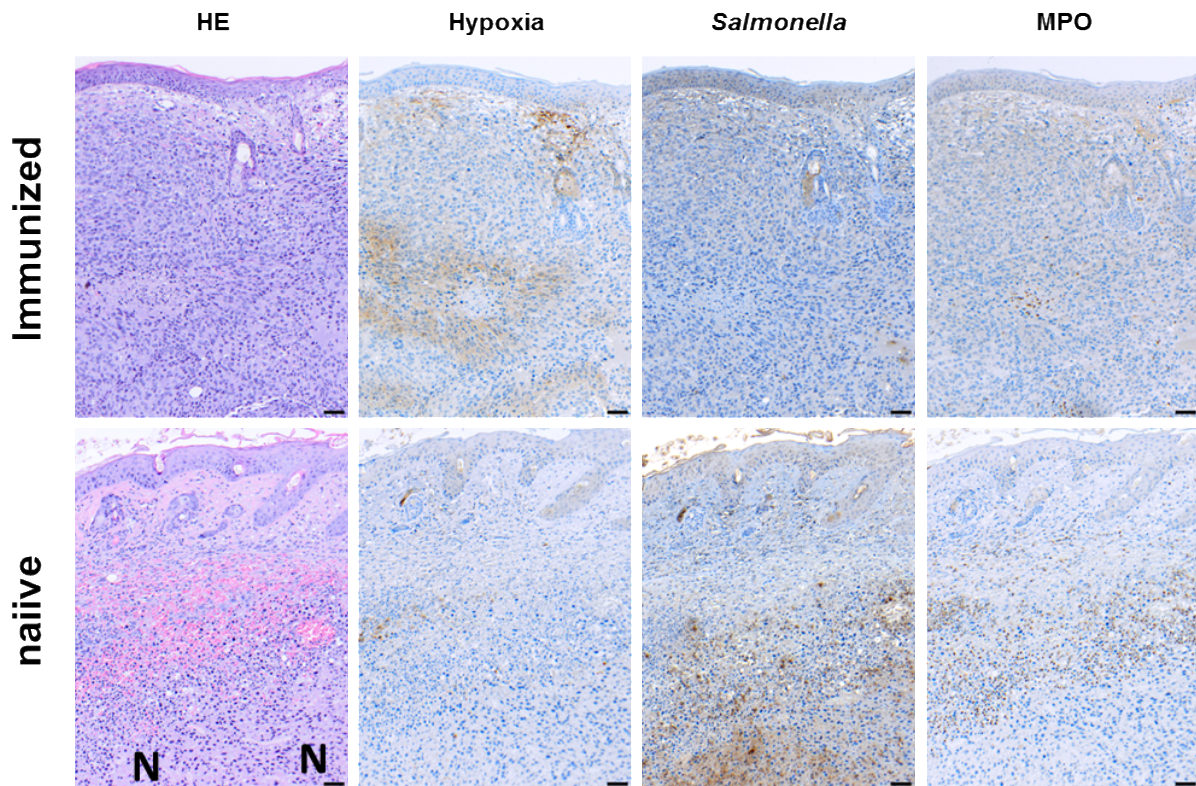

76

77 **Supplementary Figure S8: Pre-exposure reduces the formation of necrosis in the early**  
78 **stages of infection upon intratumoral infection with *Salmonella*.** CT26 tumor-bearing  
79 mice were infected with  $5 \times 10^6$  SF200 ( $\Delta lpxR9 \Delta pagL7 \Delta pagP8 \Delta aroA \Delta ydiV \Delta fliF$ ) via  
80 intratumoral infection. 24 hpi, tumors were isolated and prepared for immune histochemical  
81 staining. Immunized mice are less prone to necrosis formation and hypoxia. Dispersion of  
82 salmonellae in and beyond necrotic center, and presence of neutrophils in immediate  
83 proximity to the salmonellae was only clearly visible in naïve mice. “N” denotes areas  
84 necrosis. Hypoxia was stained with antibodies against metabolites of pimonidazole-HCl,  
85 otherwise administered i.v. 30 mins prior to isolation. Myeloperoxidase (MPO) denotes  
86 presence of neutrophilic granulocytes, and *Salmonella* was stained using a specific antibody.  
87 Differential staining was performed on consecutive sections. Scale bar corresponds to 100  
88  $\mu\text{m}$ . Images representative of at least 3 replicates are displayed.



89

## Supplementary Figures

90 **Supplementary Figure S9:**

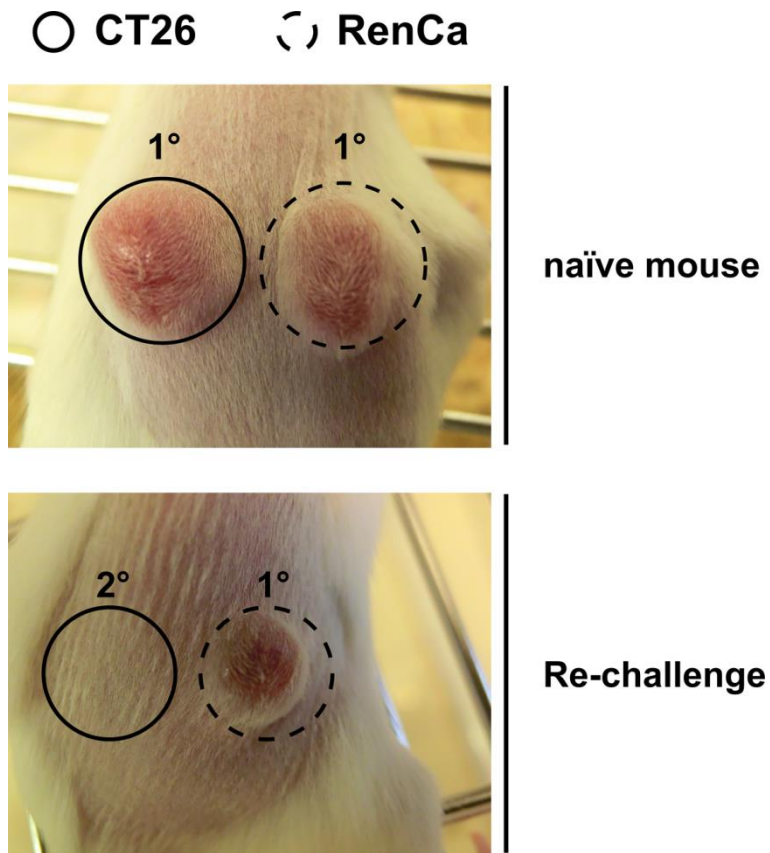

91

92 **Supplementary Figure S9: Re-challenge (2°) experiment with CT26.** Upon successful CT26  
93 tumor clearance in response to SF200 (*ΔlpxR9 ΔpagL7 ΔpagP8 ΔaroA ΔydiV ΔfliF*), mice  
94 were re-inoculated with CT26 (2°). Concurrent primary inoculation (1°) of RenCa and  
95 inoculation on naïve mice served as control. Pictures display tumors 14 days post inoculation.

96 **Supplementary Figure S10:**

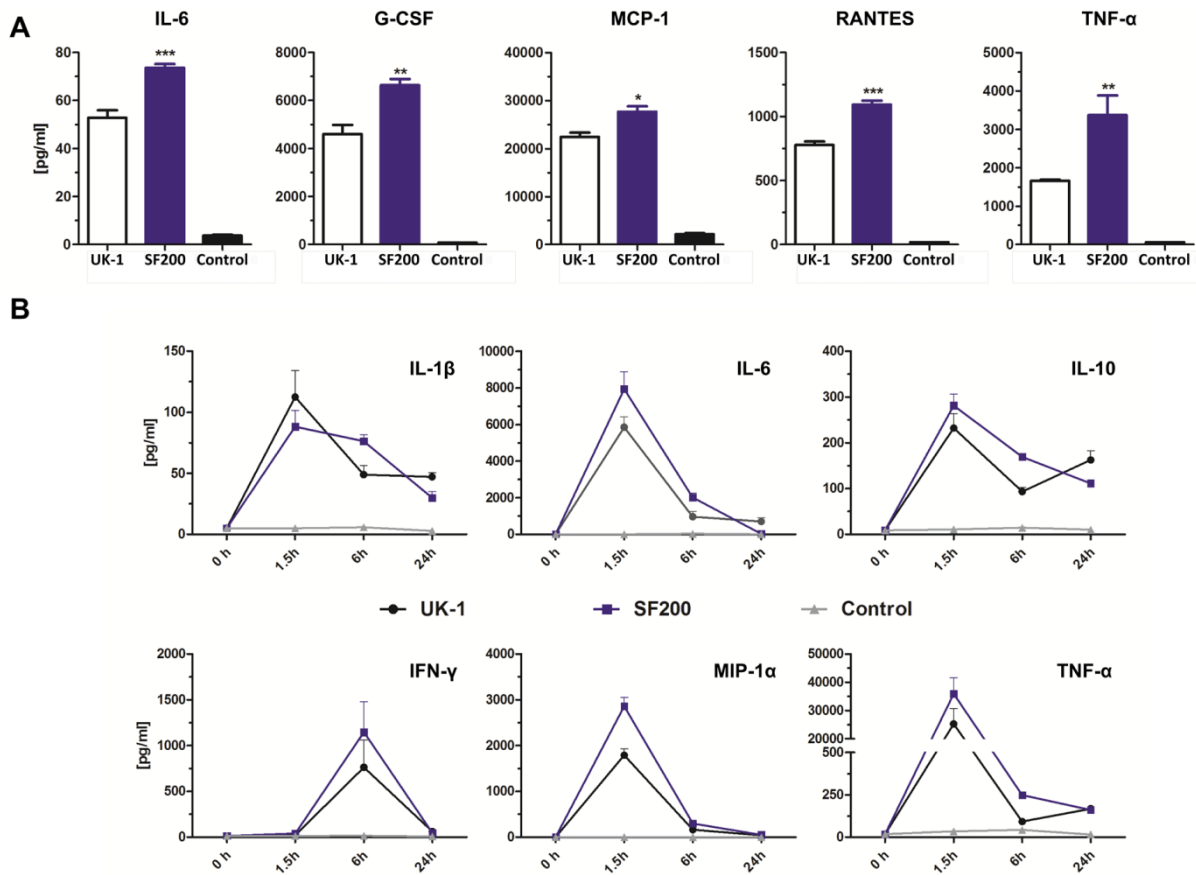

97

98 **Supplementary Figure S10: Cytokine, chemokine and growth factor detection in**  
 99 **supernatants, sera and lysates upon infection with SF200 and Wt.** Cytokine, chemokine  
 100 and growth factor concentrations in supernatants of (A) 264.7 RAW macrophages cells (6 hpi  
 101 with MOI 10) and (B) sera (1.5 hpi, 6 hpi and 24 hpi; infection:  $5 \times 10^6$  SF200 or  $5 \times 10^6$  Wt)  
 102 were quantified. The cytokine levels were analyzed using a Bio-PlexPro™ kit and compared  
 103 to Wt infections. Displayed are values of mean  $\pm$  SD of four replicates in each group.  
 104 Uninfected macrophages and mice served as control.

105

## Supplementary Table

106 **Supplementary Table S1: Bacterial strains and plasmids used in this study**

| Strain                                       | Description                                                                              | Source      | Ref. |
|----------------------------------------------|------------------------------------------------------------------------------------------|-------------|------|
| <b><i>Salmonella</i> Typhimurium strains</b> |                                                                                          |             |      |
| <b>SL7207</b>                                | <i>hisG</i> <sup>-</sup> , <i>ΔaroA</i>                                                  | Lab stock   | (1)  |
| <b>SF200</b>                                 | <i>ΔlpxR9 ΔpagL7 ΔpagP8 ΔaroA ΔydiV ΔfliF</i>                                            | This study  | -    |
| <b><i>E. coli</i> strains</b>                |                                                                                          |             |      |
| <b>Symbioflor-2</b>                          | <i>Escherichia coli</i> Symbioflor-2<br>(G1/2, G3/10, G4/9, G5, G6/7 and G8, pooled 1:1) | SymbioPharm | -    |

107 1. Hoiseth SK and Stocker BA. Aromatic-dependent *Salmomella* Typhimurium are non-virulent and effective as  
 108 live vaccines. Nature. 1981; 291:238-9.
